# Supplementary material for: Home Use of Automated External Defibrillators for Sudden Cardiac Arrest
Source: Atypon-hosted journal article supplement (doi:10.1056/nejmoa0801651), 2008-04-01
Supplement: nejm_bardy_1793sa1.pdf [file nejm_bardy_1793sa1.pdf]

## Supplementary Appendix

This appendix has been provided by the authors to give readers additional information about their work.

Supplement to: Bardy GH, Lee KL, Mark DB, et al. Home use of automated external defibrillators for sudden cardiac arrest. *N Engl J Med* 2008;358:1793-804. DOI: 10.1056/NEJMoa0801651.

## HAT Author APPENDIX

The Investigators of the Home Automated External Defibrillator (HAT) Trial (listed in order of number of patient's randomized - highest number enrolled listed first):

*Dudley Group of Hospitals NHS Trust, West Midlands UK, CS Barr, A Tselios, M Saim; Waikato Hospital, Hamilton, NZ, H. McAlister, L Lowe, D Peek, S Jaques; University Hospitals of Leicester NHS Trust, Leicester UK, WD Toff, JD Skehan, I Squire, R Pathmanathan, R Pearse, P DeSouza, K Fairbrother, O Brett, E Parker, L Shipley; Parkview Research Center, Fort Wayne, IN, M Mirro, R Plant, J Needham; Pikes Peak Cardiology, Colorado Springs, CO, D Rosenbaum, G Gregory; Wesley Hospital, Auchenflower, QLD, AU, D Colquhoun, McColl S, C Langford, A Ward; King Street Cardiology, Oshawa, ON, CA, J Cha, J Otis, C Wall; Cambridge Cardiac Center, Cambridge, ON, CA, A Pandey, B Pugh; Coff's Harbour Health Campus, Coff's Harbour, NSW, AU, J Waites, P Cahill, P Parsons; Scarborough Cardiology Research, Scarborough, ON, CA, A Janmohamed, B Bozak, K Brown; Mayo Clinic, Rochester, M, D Packer, K Monahan, C Bluhm, L Peterson, K Wock, J Harldson; Brampton Research Associates, Brampton, ON, CA, M Gupta, J Burtcher; Christchurch Hospital, Christchurch NZ, I Crozier, C Cruickshank, M Hume, B Davies; Mildura Cardiology, Mildura, VIC, AU, A Soward, T Lauder, R Johns; William Osler Health Centre, Etobicoke, ON, CA, T B To, S Coleman; Wollongong Hospital, Port Kembla, NSW, AU, E Vogl, J Kesby, S MacKinley; Gurcharan Syan Medicine Corporation, Sudbury, Ontario CA, G Syan, S Syan, R Coomba, S Chenard; 4040 Cardiology Research Associates, Scarborough, Ontario CA, R Nitkin, D Hutton, L Charles; Heart Care Research, Oshawa, Ontario CA, R Bhargava, C Stata, C Stafford; Presbyterian Heart Group, Albuquerque, NM, L Nair, P Nail, R Woods; North Shore Hospital - Waitemata, Auckland, NZ, G Armstrong, G McAnnalley, R Haycock, J Shirtcliffe; Dr. N Krishnan, Lindsay, Ontario CA, N Krishnan, C McBride; Trillium Health Centre, Mississauga, Ontario CA, P Kannampuzha, D Kennedy, H Hink; Newmarket Cardiology Research Group, Newmarket, Ontario CA, Z Wulffhart, C Mc Pherson, C Jones; Creighton Cardiac Center, Omaha, NE, S Mohiuddin, E Butkus, S Byers; Prince Charles Hospital, Chermside, QLD, AU, M West, A Carle, J West; Royal Prince Alfred Hospital, Sydney, NSW, AU, M Kilborn, K O'Connor, M Hall, V Miller, M Pryor; Sunnybrook and Womens' CHSC, Toronto, Ontario CA, E Crystal, E Levitin, J Vecchio; Lyell McEwin Health Service, Elizabeth Vale, SA, AU, J Horowitz, C Zeitz, J Rose, B Hoffman; Eastbourne Cardiac Devices Research Fund DTZC, Eastbourne, East Sussex UK, AN Sulke, C Harrison, S Wilkinson-Cox; Queen Elizabeth Hospital, Adelaide, Woodville AU, J Horowitz, C Green; South Broward Cardiology, Hollywood, FL, R Mitrani, D Weaver, C Basignani, M Di Mattia; University of Queensland - Princess Alexandra Hospital, Brisbane, QLD A, T Marwick, C Hall; Epworth Hospital, Richmond, VIC, AU, R Dick, N Thurston; Monash Medical Centre, Clayton, VIC, AU, J Boxall, N Cummings, L Jenkins; Mid Carolina Cardiology, Charlotte, NC, MS Kremers, K McEachern, J Bumgarner, S Hart; Launceston General Hospital, Launceston, TAS, AU, B Singh, M a'Campo, J Franklin; Gene B. Trobaugh Cardiology, Enumclaw, WA, G Trobaugh, A Trobaugh; Royal Brisbane Hospital, Herston, QLD, AU, D Cross, L Lilwall, L Hindom; John Hunter Hospital, Newcastle ,NSW, AU, J Leitch, J Holliday, E Hicks; Cardiovascular Specialists PC, Syracuse, NY, M Beshara, J Medicis; St. Michael's Hospital, Toronto, Ontario CA, P Dorian, L Austin; Intermountain Research Consultants, Thunder Bay, Ontario CA, A Weeks, S Stoger; Middlemore Hospital, Auckland, NZ, D Heaven, J Leary; P Grey; Barts and the London NHS Trust, London, UK, R Schilling, L Richmond, V Mullan; Eastern Virginia Medical School, Norfolk, VA, J Herre, K Barackman, L Klevan; Diagnostic Cardiology, PA, Jacksonville, FL, W Short,*

M Thompson, O Rotandaro; *Royal Perth Hospital, Perth, WA, AU*, M Davis, L. Ferguson, C Venn-Edmonds; *Kelowna Cardiology Research, Kelowna, British Columbia, CA*, F Halperin, V Stedman; *Galen Medical Group, Chattanooga, TN*, M Geer, D McDaniel, A York; *McGill University Health Centre, Montreal, QC, CA*, M Sami, D Liebling; *Cardiology Research Group c/o Dr. Hans Strauss, Mississauga, ON, CA*, H Strauss, P Anderson, S Silver; *Southampton University Hospitals NHS Trust, Southampton, UK*, J Morgan, S Earles; *The Canberra Hospital, Woden, ACT, AU*, D McGill, P Tavener, A Kam; *Heart Research Institute of Western Australia, Nedlands, WA, AU*, P Thompson, N Mammatt; *Portland VA Medical Center, Portland, OR*, M Raitt, A Van Deusen, T Krall; *Good Hope Hospital NHS Trust, Sutton Coldfield, West Midlands UK*, F Leyva, S Chalil, N Irwin; *Castle Hill Hospital, Hull and East Yorkshire Hospitals, Cottingham, East Yorkshire, UK*, J Cleland, R Brothwell, P Atkin; *Prince of Wales Hospital, Randwick, NSW, AU*, W Walsh, M Madigan, A Russell; *Nambour General Hospital, Nambour, QLD, AU*, S Coverdale, C Cocks, S Murray, M Courtney; *University of Calgary, Calgary, AB, CA*, D Exner, LB Mitchell, D Ramadan; *Atlanta Research 7 Education Foundation, Atlanta GA*, S Dudley, I Shukrullah, J Cuellar, A Lane; *Washington Regional Medical Center, Fayetteville, AR*, J Cooper, EA Courtney-Eighmy, A Barnes, S Johnson; *Idaho Cardiology Associates, P.A., Boise, ID*, M Marks, V Graves, K Curry; *Dr. Labonte, Sudbury, ON, CA*, R Labonte, N Mayhew; *Heartland Cardiovascular Center, L.L.C., Joliet, IL*, M Martini, J Benson; *Advocate Lutheran General Hospital, Park Ridge, IL*, W Mialis, G Fini; *Geelong Cardiology Practice, Geelong, VIC, AU*, J Amarena, D Campbell, L Wilson; *Gold Coast Hospital, Southport, QLD, AU*, G Aroney P Hicks; *Case Western Reserve University, Cleveland, OH*, B Stambler, S Mazzurco; *Dr. Mecci, Sudbury, ON, CA*, S Mecci, J Jacobson; *Great Western Hospital, Swindon and Marlborough NHS Trust, Swindon, UK*, W McCrea, C Wretham, L Mann; *Christiana Care Health Services, Newark, DE, US*, R O'Connor, M Bollinger; *University of Medicine & Dentistry of New Jersey, New Brunswick, NJ*, J Kostis, N Cosgrove, D Bankowski; *Alaska Cardiovascular Research Foundation, Anchorage, AK*, P Peterson, L Heaney, B Peterson; *Cincinnati VA Medical Center, Cincinnati, OH*, S Khoury, D Bliss, J Edwards, C Werner; *Castle Hill Hospital, Hull and East Yorkshire Hospitals, Cottingham, East Yorkshire UK*, J Cleland, P Atkin, R Brothwell; *Royal Alexandra Hospital, Edmonton, AB, CA*, R Williams; L Kvill, K Paradon; *Regional Cardiology Associates, Sacramento, CA*, A Sharma, A Skadsen, S Allen; *Joseph Brant Memorial Hospital Cardiology Associates, Burlington, ON, CA*, L Carling-Chambers, A Magi; *Body and Soul, P.C., Elkins Park, PA*, J Louis-Charles; *Healthy Heart Research Center, North York, ON, CA*, K Kwok, D Dejewski; *The Cardiothoracic Centre – Liverpool, Liverpool, UK*, D Todd, H Lindsay, H Rogers; *The Southern Adelaide Health Service, Bedford Park, SA, AU*, W Heddle, A Graham, C Edwards; *Green Lane Hospital/ Auckland City Hospital, Auckland, NZ*, W Smith; M Hood, P Hughes, H Hinds; *Central Gippsland Health Service, Sale, VIC, AU*, R Ziffer, A Johnson, J Dennett; *Heart Health Institute, Calgary, AB, CA*, P Ma, C Robertson; *Cooper Health System, Camden, NJ*, L Gessman, N Wiener J Ryan; *Westheights Cardiology, Kitchener, ON, CA*, M Pearce, C McBride; *Taunton and Somerset Hospital, Taunton, UK*, M. James S Burtchaell; *University of Missouri Health Care, Columbia, MI*, G Flaker, K Belew; *Dandenong Hospital Cardiology Research, Dandenong, VIC, AU*, J Counsell, N Cummings, L Jenkins, *Texas Cardiac Arrhythmia Research, Austin, TX*, R Canby, D Cardinal, C Scallion; *Morrison Hospital, Swansea, Wales UK*, M Anderson, L Bastin, K Richards; *Dr. M.P.J. Senaratne Professional Corporation, Edmonton, AB, CA*, M Senaratne, J Powell, A Dacyk; *Four Corners Heart Clinic, Durango, CO*, F DeRook, K Comess, S Carswell, E Miller; *Peterborough District Hospital, Peterborough, UK*, D Rowlands, L Archer, W Joyce; *Wenatchee Valley Clinic, Wenatchee, WA*, J Gorham, M Mires, C Holcomb; *Gayles Medical Center, Buffalo, NY*, K Gayles; *Internal Medicine Associates of Sanford, Sanford, ME*, M Bhargava, S Manchester; *Royal Devon and Exeter NHS Foundation Trust, Exeter, UK*, C Rinaldi, P Spurrell, A Renouf; *Brighton and Sussex University Hospital, Brighton, Sussex UK*, S O'Nunain, A MacKenzie, N

Cooter; *Thoracic and Cardiovascular Healthcare Foundation, Lansing, MI*, J Ip, L Blaske, T Zambon; *Cornwall Clinical Trials, Cornwall, ON, CA*, J DeYoung, M Watt; *Aberdeen Royal Infirmary, Aberdeen, UK*, P Broadhurst, M Jamieson, A Lewis; *Cardiology Medical Associates, P.C., Philadelphia, PA*, G DeVaughn, J Delcampo; *Southwest Heart, Tucson, AZ*, B Peart, K Peart, J Stein; *Hamilton Health Sciences, Hamilton, Ontario CA*, C Morillo, V Malcolm, S Morgan; *Halton Heart Institute, Burlington, ON, CA*, T Vakani; *London Health Sciences Centre Research Inc., London, ON, CA*, R Yee, B Spindler, C Bentley; *Sioux Valley Clinic- Heart Partners, Sioux City, SD*, S Pham, C Clayton, K Reilly; *Dr. Nawaz, Sudbury, ON, CA*, S Nawaz; *Craigavon Area Hospital, Co. Armagh, Northern Ireland, UK*, D McEneaney, A Moriarty, K Scott; *St. Paul Heart Clinic, St. Paul, MN*, S Adler III, L Nelson, J Gilliam; *Royal Hobart Hospital, Hobart, TAS, AU*, P Roberts-Thomson, P Neid, C McIntosh; *State University of New York at Brooklyn, Brooklyn, NY*, JE Mitchell, M Caboral; *Peninsula Cardiology Associates, P.A., Salisbury, MD*, E Nsah, L Armingier, D Morrison; *Penn State College of Medicine, Hershey, PA*, J Boehmer, K Dwyer; *Krannert Institute of Cardiology, Indianapolis, IN*, W Groh, S Bondurant, M Lowe; *Comprehensive Cardiology Consultants, Inc., Cincinnati, OH*, D Suresh, D Bliss, C Jenkins; *Tauranga Hospital, Tauranga, NZ*, G Porter, J Goodson; *Augusta Biomedical Research Corp, Augusta, GA*, M Mandawat, L Reese, T Raines; *Austin & Repatriation Medical Centre, Heidelberg, VIC, AU*, J Johns, L Brown; *Midwest Heart Research Foundation, Lombard, IL*, M Nora, H Iyengar, K Caputo; *Metro Health Medical Center, Cleveland, OH*, K Quealy, L McGowen, K Svoboda; *Dr. Juma, Sudbury, ON, CA*, Z Juma; *The Luton and Dunstable Hospital, Luton, UK*, C Travill, S Gent, W Harvey; *United Lincolnshire Hospitals NHS Trust, Lincoln County Hospital, Lincoln, UK*, R Andrews, J Wiseman, T Simpson; *Vivantes Klinikum Am Urban, Berlin, DE*, D Andresen, C Baxter; *Poole Hospital NHS Trust, Poole, Dorset UK*, A McLeod, K Knops; *Northern Territory Cardiac Services, TIWI, NT, AU*, M Ilton; *Rhode Island Hospital, Lifespan Academic Medical Center, Providence, RI*, G McKendall; *Virginia Medical Group, Colonial Heights, VA*, B Spencer, P Barnes-Griffin; *Nepean Hospital, Penrith, NSW, AU*, M Fitzpatrick, D Schoveres, K Pepper; *Colorado Springs Health Partners, Colorado Springs, CO*, J Speer, L Gordon; *University of Alberta, Edmonton, AB, CA*, S Kimber, L Haykowsky; *Heart Center of the Rockies, Fort Collins, CO*, W Voyles, D Robeson; *University of Pennsylvania Health System, Philadelphia, PA*, A Russo, D Meehan; *Medical University of South Carolina, Charleston, SC*, S. Chiaramida, D Adams, A Doctor; *Arizona Arrhythmia Consultants P.LC, Scottsdale, AZ*, T Mattioni C Williams, B Vandermate; *Basildon Hospital, Basildon, Essex UK*, R Aggarwal, L Wright, T Banks; *Worthing and Southlands Hospitals NHS Trust, Worthing, Sussex UK*, B Kneale, L Huggins, J Scott ; *University of Otago, Dunedin, NZ*, G Wilkins, L Gulliver, R Oskam-Schmidt; *Endovascular Research, Eugene, OR*, J Chambers, D Butler-Sharp; *Toronto East General Hospital, Toronto, ON, CA*, G Rewa; *Preventive Cardiology Associates, Alameda, CA*, S Raskin; *Harborview Medical Center, Seattle, WA*, E Gill; *Allegheny-Singer Research Institute, Pittsburgh, PA*, S Dianzumba; *Inland Cardiology Associates, P.S., Spokane, WA*, D Chilson; *Medical College of Georgia, Augusta, GA*, J Thornton, *Roseburg Heart Associates, Roseburg, OR*, F Munkenbeck; *SGH Cardiology, Scarborough, ON, CA*, S Roth; *One Heart- The Cardiology Specialists, Baltimore, MD*, A Morgan; *HeartCare, Los Angeles, CA*, M Wong, L Biao; *Scripps Mercy Hospital, San Diego, CA*, J Stein; *Florida Arrhythmia Consultants, Ft. Lauderdale, FL*, R Luceri; *St. Joseph's Health Centre, Toronto, ON, CA*, M Fisher; *Deborah Heart and Lung Center, Browns Mills, NJ*, A Agocha; *The Methodist Hospital Research Institute, Houston, TX*, J Buegler; *Imperial College of Science, Technology and Medicine, London, UK*, N Peters; *The University of Chicago Medical Center, Chicago, IL*, A Davis; *Royal Adelaide Hospital, Adelaide, SA, AU*, L Maher; *Texas Heart Institute/St. Luke's Hospital, Houston, TX*, J Cheung; *Morehouse School of Medicine, Atlanta, GA*, E Ofili, J Morgan; *United Lincolnshire Hospitals NHS Trust, Grantham District Hospital, Grantham, UK*, A Houghton; *New York - Presbyterian Hospital/ Columbia University, New York, NY*, R Bijou; *Bryan LGH Heart Institute,*

*Lincoln, NE*, S Krueger; *Oklahoma Heart Research and Education Foundation, Tulsa, OK*, W Leimbach; *Cairns Base Hospital, Cairns, VIC, AU*, P Boyd; *North General Hospital, New York, NY*, H Saint-Jacques; *Comprehensive Adult Risk Evaluation, San Leandro, CA*, G Hilliard; *University of Massachusetts Medical School, Worcester, MA*, L Rosenthal; *JH Cardiovascular Group, Inc, Baltimore, MD*, C Ezeugwu; *PMI Health Research Group, Atlanta, GA*, D Head; *Erasmus MC, Rotterdam, NL*, L Jordaens; *Akron General Heart Center, Akron, OH*, G Litman; *Baltimore Heart Associates. P.A., Randallstown, MD*, B Walters; *Methodist Medical Center, Peoria, IL*, I Singer; *Concord Repatriation General Hospital, Concord, NSW, AU*, S Freedman; *Taranaki Base Hospital, New Plymouth, NZ*, I Ternouth

**Coordinating Center:** Seattle Institute for Cardiac Research, Seattle, WA: G.H. Bardy, J.E. Poole, J. Anderson, G.W. Johnson, E. Bischoff, C.D. Munkers. **Data Coordinating Center:** Duke Clinical Research Institute, Durham, NC: K.L. Lee, S.E. McNulty, M.A. Smith. **EQOL**

**Coordinating Center:** Duke Clinical Research Institute, Durham, NC: D.B. Mark, L.Davidson-Ray, N.E. Clapp-Channing, D. Minshall-Liu. **Data and Safety Monitoring Board:** W.Douglas Weaver, MD (Chair), Henry Ford Health System Detroit, MI; Kathleen Dracup, RN, PhD, University of California San Francisco San Francisco, CA; Robert Zalenski MD, Birmingham, MI; Joni Beshansky RN, MPH, New England Medical Center, Boston MA; , Barry R. Davis, MD, PhD, University of Texas at Houston, Houston, TX; John P. DiMarco, MD PhD, University of Virginia Health Care System, Charlottesville, VA. **National Institutes of Health, NHLBI, Bethesda, MD:** Eleanor Schron, PhD, RN, FAAN; Yves Rosenberg, MD MPH; Michael Proschan, PhD; Nancy L. Geller, PhD; Marcel Salive, MD MPH; Michael J.Domanski, MD; Jerome L. Fleg, MD.

**Executive Committee:** Gust H. Bardy, MD (Chair), Seattle Institute for Cardiac Research, Seattle; Kerry L. Lee, PhD (Co-Chair), Duke Clinical Research Institute, Durham; Daniel B. Mark, MD, MPH, Duke Clinical Research Institute, Durham, NC; Jeanne E. Poole, MD, University of Washington, Seattle, WA; Andrew Tonkin, MD, Monash University, Melbourne, AU; William D. Toff, MD, University of Leicester, Leicester, UK; Warren Smith, MBChB, Auckland City Hospital, Auckland, NZ; Paul Dorian, MD, St. Michael's Hospital, Toronto, ON, Canada; Will Longstreth, M.D., University of Washington, Seattle, WA; Douglas L. Packer, M.D., Mayo Clinic Foundation, Rochester, MN; Roger D. White, MD, Mayo Clinic College of Medicine, Rochester, MN, Eleanor Schron, PhD, RN and Yves Rosenberg, MD, MPH, National Heart, Lung, and Blood Institute, Bethesda, MD.

**Events Committee:** Douglas L. Packer, MD (Chair), Mayo Clinic Foundation, Rochester; Kerry L. Lee, PhD, Duke Clinical Research Institute, Durham; Greg Flaker, MD University of Missouri, Columbia; L. Brent Mitchell, MD, University of Calgary, Alberta, Canada; Bruce Stambler, MD, Case Western Reserve, Cleveland, William D. Toff, MD, University of Leicester, Leicester, UK; Warren Smith, MBChB, Auckland City Hospital, Auckland, NZ; Judith Mitchell, MD, State University of Brooklyn New York, Brooklyn, NY; Andrea Russo, MD University of Pennsylvania, Philadelphia, Pa; Paul Dorian, MD, St. Michael's Hospital, Toronto, ON, CA; Roger D. White, MD, Mayo Clinic College of Medicine, Rochester MN, Derek Exner, MD, University of Calgary, Alberta, Canada; Arjun Sharma, MD, Regional Cardiology, Sacramento, CA; John Amarena, MD, Geelong Cardiology Practice, Geelong, VIC, AU; , Mark S. Kremers, MD, Mid Carolina Cardiology, Charlotte, NC; and Yves Rosenberg, MD, MPH; and Eleanor Schron, PhD, RN, National Heart, Lung, and Blood Institute, Bethesda, MD.

**AED Electrogram Committee:** Jeanne E. Poole, MD (Chair), Seattle Institute for Cardiac Research, Seattle; Merritt H. Raitt, MD, Portland

Veterans Administration Medical Center, Portland; Blair Halperin, St. Vincents/Emmanuel Health Care System, Portland; Ramakota K. Reddy, MD, Oregon Cardiology, PC, Eugene.

**Patient's and Families Psychological Response to HAT (PR-HAT) Substudy:** Sue A. Thomas, RN, PhD, Erika Friedmann, PhD, Patricia G. Morton, RN PhD, Janice Anarino, University of Maryland School of Nursing, Baltimore, MD.

**Association of Black Cardiologists, Inc:** B. Wayne Kong PhD, Melanie Dowdell MBA, Tammie Bell BA, Felicia Warren, Atlanta, GA.
